# Supplementary material for: Modification of microfluidic paper-based devices with silica nanoparticles
Source: Royal Society of Chemistry journal article supplement (doi:10.1039/c4an01147c), 2014-01-01
Supplement: c4an01147c1.pdf [file c4an01147c1.pdf]

*Supplementary Information for*

## Modification of Microfluidic Paper-Based Devices with Silica Nanoparticles

Elizabeth Evans, Ellen Flávia Moreira Gabriel, Tomás E. Benavidez, Wendell Karlos Tomazelli Coltro,  
and Carlos D. Garcia

**Calculation of the Adsorption Rates.** The adsorption rates described in the article correspond to three different zones identified in the dynamic adsorption experiment, which slopes were calculated using the least-square method. The first value ( $d\Gamma/dt_0$ ), corresponds to an initial fast adsorption rate of GOx onto the bare surface of the silica wafer and was calculated with the first representative data points (<5) after the protein was introduced in the cell. The second value ( $d\Gamma/dt_1$ ), corresponds to the change in the adsorption rate of GOx immediately after the fast process observed subsequently the injection of the enzyme. Finally, the third value ( $d\Gamma/dt_2$ ) shows another slow adsorption process during the impinging of GOx on the silica substrate.

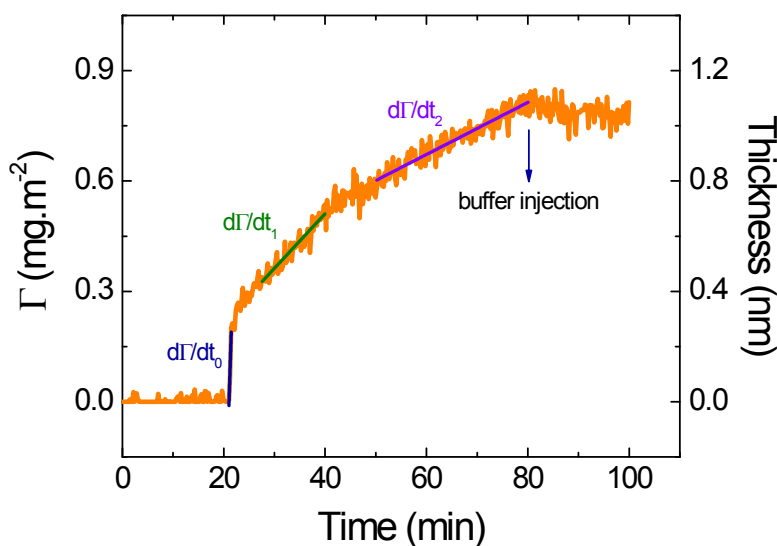

Figure SI 1: Calculation of the adsorption rates from the dynamic adsorption experiment on bare silica

wafer (information about the selected experimental conditions are included in Fig. 2 of the manuscript).

### Color Intensity and Uniformity

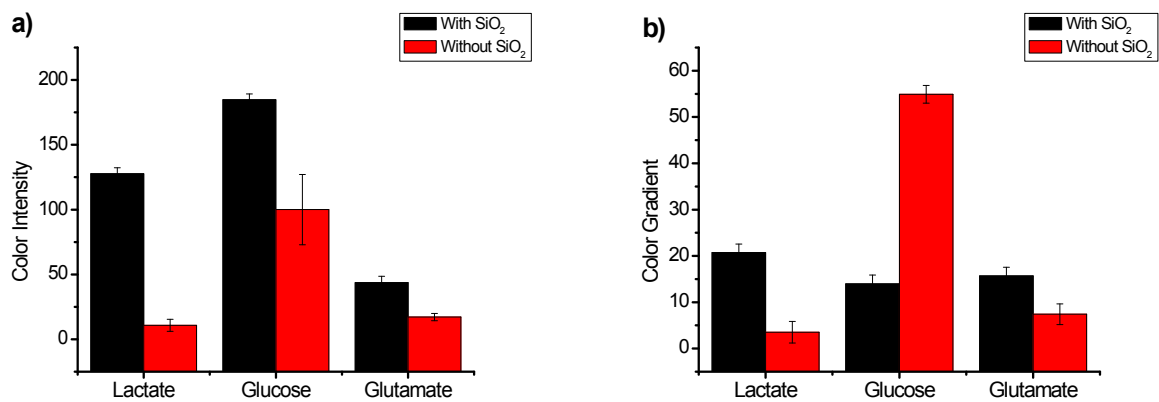

Figure SI 2: The analysis of a) color intensity and b) color gradient from  $\mu$ PAD images in Fig. 3 on native and silica-modified paper.
